# Supplementary material
Source: ML conference proceedings conference paper supplement (https://proceedings.neurips.cc/paper_files/paper/2010/hash/2d6cc4b2d139a53512fb8cbb3086ae2e-Abstract.html)
Supplement: Supplementary file [file 2d6cc4b2d139a53512fb8cbb3086ae2e-Supplemental.zip]

## 1 Supplementary figures for Section 5.3

In Section 5.3 of the paper we show the results in a compressive sensing recovery experiment with synthetic data for RWBP and RW<sub>5</sub>BP. We show here two additional results. First, we show in Figure 1 the compressive sensing recovery results using Basis Pursuit (BP) as the recovery algorithm. Second, we show in Figure 2 the compressive sensing recovery results using the algorithm with divisive normalization update with neighborhood size 5 (RW<sub>5</sub>BP). The results for BP are similar to RWBP, whereas the results for RW<sub>5</sub>BP are similar to the results for RW<sub>3</sub>BP.

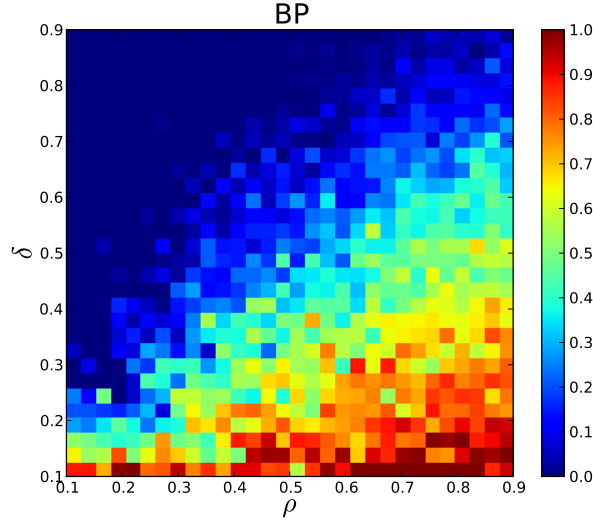

Figure 1: Compressive sensing recovery results using synthetic data. We show the phase plots for BP. On the x-axis is the sparsity of the system indexed by  $\rho = 3d/m$ , and on the y-axis is the indeterminacy of the system indexed by  $\delta = n/m$ . At each point  $(\rho, \delta)$  in the phase plot, we sample 10 compressive sensing problems and display the average recovery error.

## 2 Supplementary figures for Section 5.4

In Section 5.4 of the paper, we describe a compressive sensing experiment applied to image patches. In the paper we have compared the recovery performance of the inference algorithm corresponding to inference in a non-factorial LSM model with  $3 \times 3$  overlapping group (RW<sub>3×3</sub>BP) with the inference algorithm corresponding to inference in a factorial LSM model (RWBP). We show here how these two algorithms compare to the algorithm corresponding to inference in a factorial model with Laplacian prior (BP). We show in Figure 3 the comparison between BP and RW<sub>3×3</sub>BP, and see that RW<sub>3×3</sub>BP clearly outperforms BP. We show in Figure 4 the comparison between BP and RWBP, and see that RWBP outperforms BP as RWBP is able to find solutions with greater sparsity.

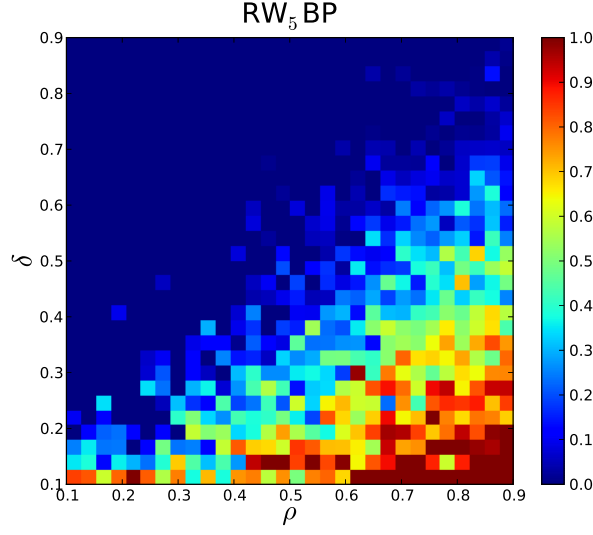

Figure 2: Compressive sensing recovery results using synthetic data. We show the phase plots for  $RW_5BP$ . On the x-axis is the sparsity of the system indexed by  $\rho = 3d/m$ , and on the y-axis is the indeterminacy of the system indexed by  $\delta = n/m$ . At each point  $(\rho, \delta)$  in the phase plot, we sample 10 compressive sensing problems and display the average recovery error.

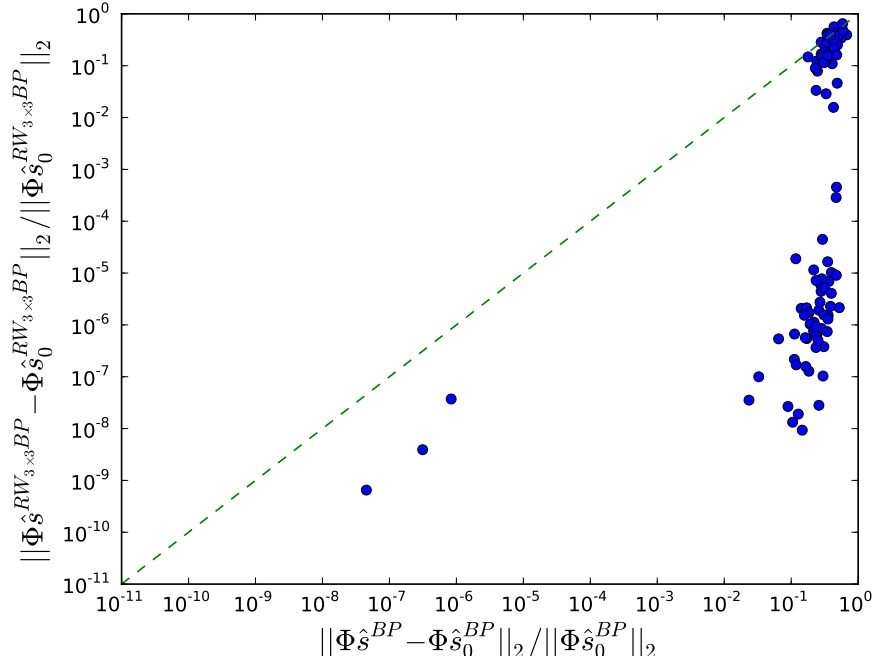

Figure 3: Compressive sensing recovery. On the x-axis is the recovery performance for the factorial Laplacian model (BP), and on the y-axis the recovery performance for the non-factorial LSM model with  $3 \times 3$  overlapping groups ( $RW_{3 \times 3}BP$ ).

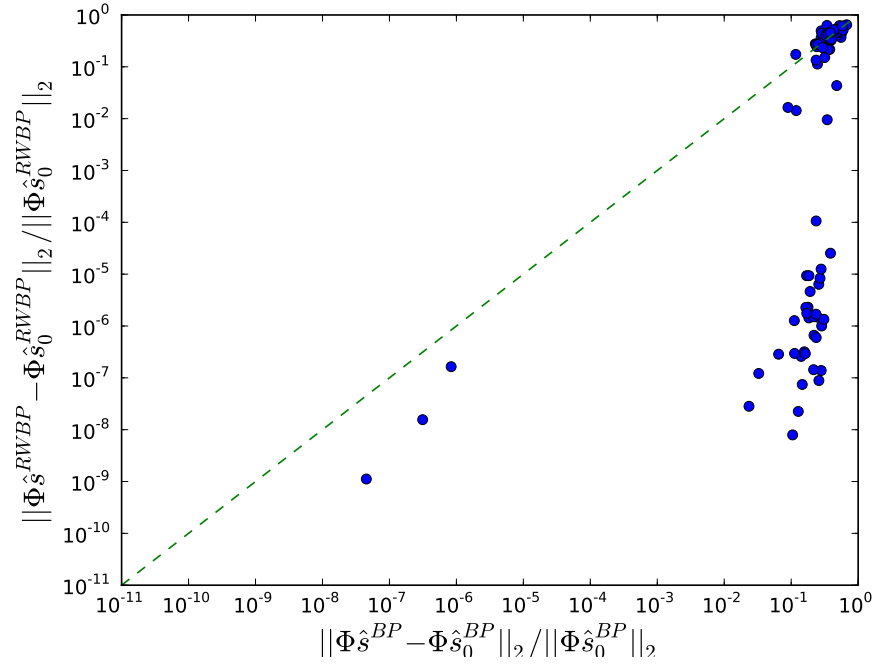

Figure 4: Compressive sensing recovery. On the x-axis is the recovery performance for the factorial Laplacian model (BP), and on the y-axis the recovery performance for the non-factorial LSM model with  $3 \times 3$  overlapping groups ( $RW_{3 \times 3}BP$ ).
